# Supplementary material for: Meta-analysis of clinical data using human meiotic genes identifies a novel cohort of highly restricted cancer-specific marker genes
Source: PubMed Central journal article supplement (PMC3478461; doi:10.18632/oncotarget.580), 2012-08-13
Supplement: oncotarget-08-843-s001.pdf [file oncotarget-08-843-s001.pdf]

# Meta-analysis of clinical data using human meiotic genes identifies a novel cohort of highly restricted cancer-specific marker genes - Feichtinger et al

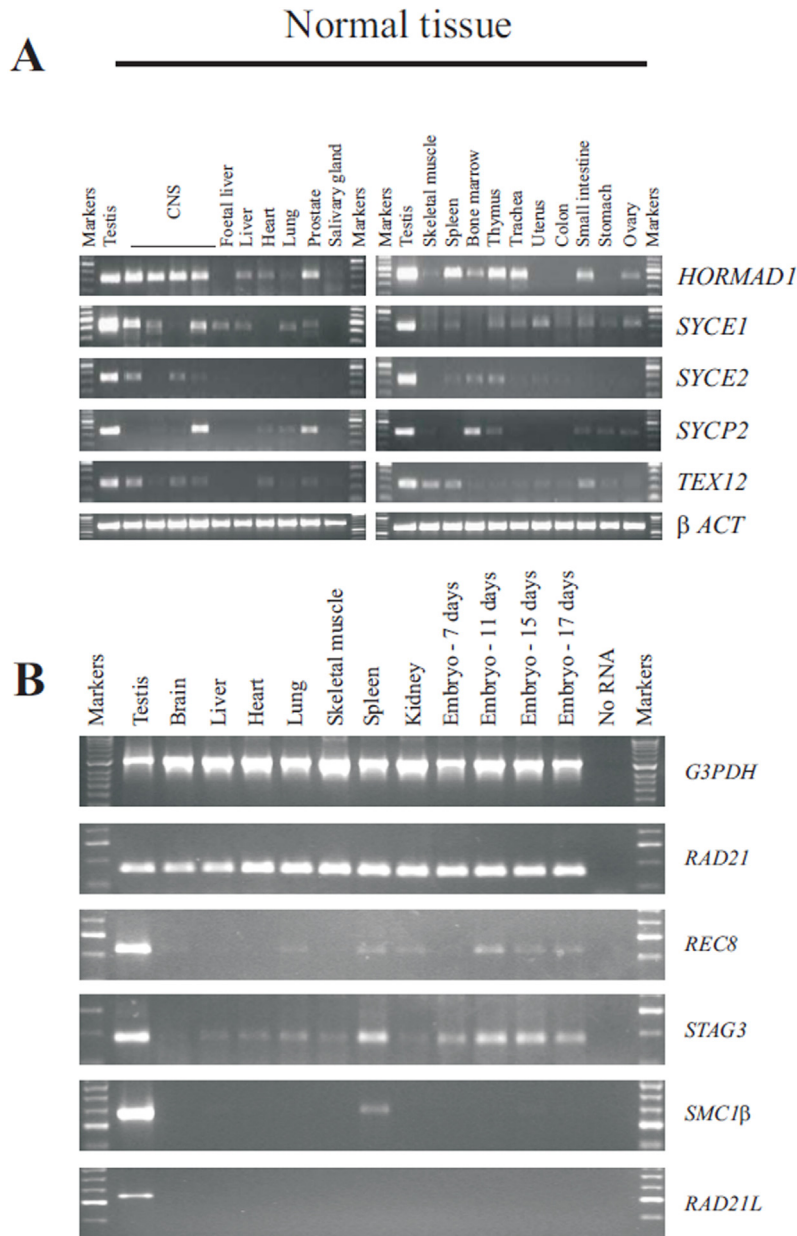

**Figure S1: RT-PCR analysis of selected human and mouse meiosis-associated genes.** **A.** Expression profiles for five human genes originally predicted to be testis-specific. The image shows agarose gels of RT-PCR products for the five genes (*HORMAD1*, *SYCE1*, *SYCE2*, *SYCP2*, *TEX12*) obtained from cDNA derived from normal human tissue RNA (obtained *post mortem*).  $\beta$ ACT gene expression is used as a control (bottom row). A selection of bands was subjected to DNA sequencing for validation. **B.** Gene expression profiles for mouse cohesin genes. The images show agarose gels of RT-PCR products for five mouse cohesin genes (*RAD21*, *RAD21L*, *REC8*, *SMC1 $\beta$* , *STAG3*). *SMC1 $\beta$*  and *RAD21L* show testis-selective and testis-restricted expression profiles respectively. The other three, *RAD21*, *REC8*, *STAG3*, exhibit expression in an extensive range of non-meiotic tissue types. *G3PDH* was used as a positive control for cDNA quality. A selection of bands was subjected to DNA sequencing for validation.

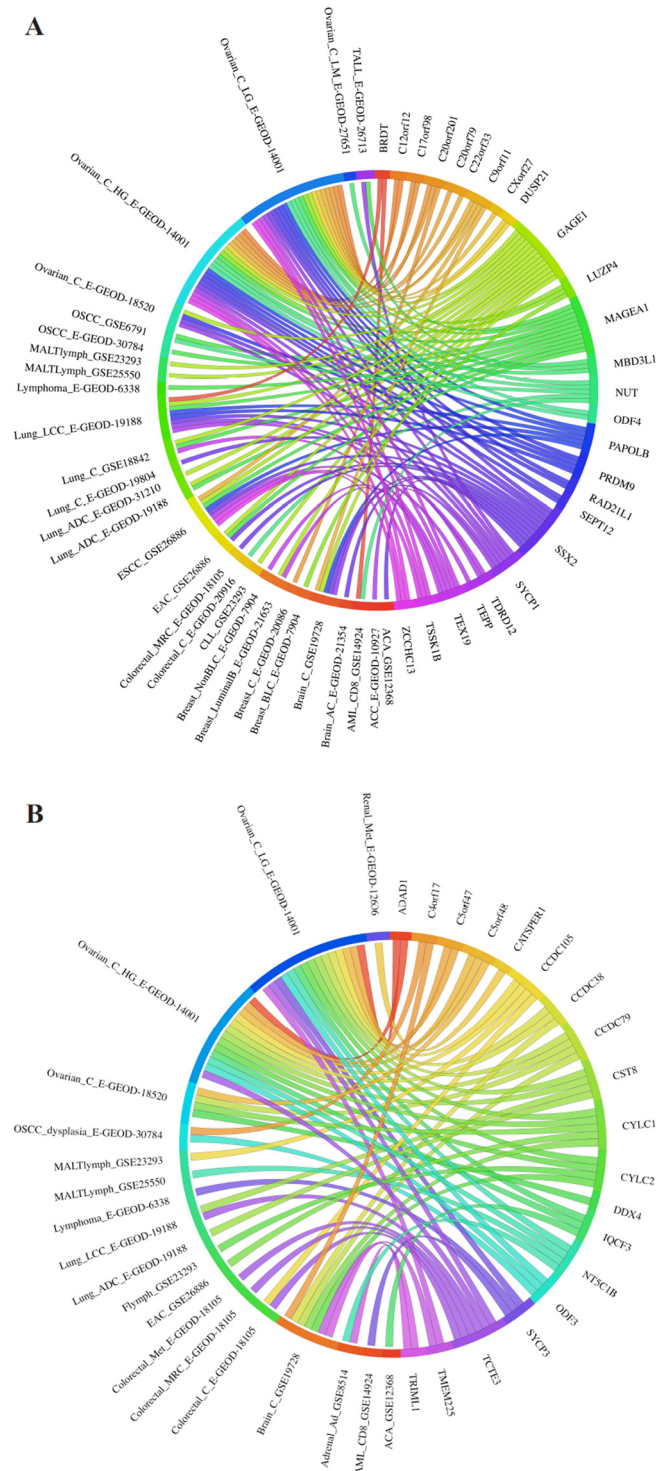

**Figure S2: Circos plots for single microarray analysis. A.** The Circos plot showing single microarray analysis in relation to corresponding cancer types for the 25 meiCT genes and the 3 known X-CT genes (*MAGEA1*, *GAGE1*, *SSX2*) covered by array sets (Supporting Information Table 4). Each connection between a gene and an individual cancer type indicates a statistically significant up regulation for that cancer type derived from a single array study for cancer tissue *vs.* normal tissue. **B.** The Circos plot showing single microarray analysis for the 21 genes which gave a testis (meiosis) only gene expression profile following RT-PCR analysis and are represented on microarrays (see Supporting Information Table 2). Each connection between a gene and an individual cancer type indicates a statistically significant up regulation for that cancer type derived from a single array study for cancer tissue *vs.* normal tissue.

**Table S1: List of selected meiosis-associated genes used in initial study.**

| Gene name             | Functional role                         | Reference                                                                                                                      | Classification following validation |
|-----------------------|-----------------------------------------|--------------------------------------------------------------------------------------------------------------------------------|-------------------------------------|
| <i>HORMAD1</i>        | Recombination partner choice regulation | Wojtasz <i>et al.</i> (2009) <i>PLoS Genetics</i> 5: e1000702<br>Shin <i>et al.</i> (2010) <i>PLoS Genetics</i> 6: e1001190    | Dismissed                           |
| <i>NUT (C15orf55)</i> | Unknown                                 | French (2012) <i>Annu Rev Pathol</i> 17: 247-265                                                                               | Restricted CT gene                  |
| <i>PRDM9</i>          | Meiotic hotspot regulation              | Hochwagen & Marais (2010) <i>Curr Biol</i> 20: R271-274<br>Neale (2010) <i>Genome Biol</i> 11: 104                             | Restricted CT gene                  |
| <i>RAD21L</i>         | Meiotic cohesin subunit                 | Lee & Hirano (2011) <i>J Cell Biol</i> 192:263-276<br>Ishiguro <i>et al.</i> (2011) <i>EMBO Rep</i> 12: 267-275                | Restricted CT gene                  |
| <i>REC8</i>           | Meiotic cohesin subunit                 | Bardhan (2010) <i>Chromosome Res</i> 18: 909-924                                                                               | Dismissed                           |
| <i>SMC1β</i>          | Meiotic cohesin subunit                 | Bardhan (2010) <i>Chromosome Res</i> 18: 909-924                                                                               | Restricted CT gene                  |
| <i>STAG3</i>          | Meiotic cohesin subunit                 | Bardhan (2010) <i>Chromosome Res</i> 18: 909-924                                                                               | Dismissed                           |
| <i>STRA8</i>          | Retinoic acid induced meiotic regulator | Anderson <i>et al.</i> (2008) <i>Proc Natl Acad Sci USA</i> 105: 14976-14980                                                   | Restricted CT gene                  |
| <i>SYCE1</i>          | Synaptonemal complex component          | Bolcun-Filas <i>et al.</i> (2009) <i>PLoS Genetics</i> 5: e1000393                                                             | Dismissed                           |
| <i>SYCE2</i>          | Synaptonemal complex component          | Bolcun-Filas <i>et al.</i> (2007) <i>J Cell Biol</i> 176: 741-747                                                              | Dismissed                           |
| <i>SYCP1</i>          | Synaptonemal complex component          | Pousette <i>et al.</i> (1997) <i>Hum Reprod</i> 12: 2414-2417<br>Tarsounas <i>et al.</i> (1999) <i>J Cell Sci</i> 112: 423-434 | Restricted CT / CNS gene            |
| <i>SYCP2</i>          | Synaptonemal complex component          | Schalk <i>et al.</i> (1998) <i>Chromosoma</i> 107: 540-548<br>Yang <i>et al.</i> (2006) <i>J Cell Biol</i> 173: 497-507        | Dismissed                           |
| <i>TEX12</i>          | Meiotically up regulated                | Hamer <i>et al.</i> (2006) <i>J Cell Sci</i> 119: 4025-4032                                                                    | Dismissed                           |
| <i>TEX19</i>          | Meiotically up regulated                | Kuntz <i>et al.</i> (2008) <i>Stem Cells</i> 26: 734-744<br>Ollinger <i>et al.</i> (2008) <i>PLoS Genetics</i> 4: e1000199     | Selective CT gene                   |
| <i>TSSK1</i>          | Meiotic serine/threonine kinase         | Li <i>et al.</i> (2011) <i>Mol Hum Reprod</i> 17: 42-56                                                                        | Restricted CT / CNS gene            |

**Table S2: 29 genes designated as testis only expression as measured by RT-PCR validation including their coverage on arrays.**

| Gene name           | Ensembl ID      | Unigene cluster ID | Array coverage                                  |
|---------------------|-----------------|--------------------|-------------------------------------------------|
| <i>ADAD1</i>        | ENSG00000164113 | Hs.518957          | 231448_at, 240299_at                            |
| <i>ARL13A</i>       | ENSG00000174225 | Hs.147237          | Not on array                                    |
| <i>ARRDC5</i>       | ENSG00000205784 | Hs.574574          | Not on array                                    |
| <i>C4orf17</i>      | ENSG00000138813 | Hs.97501           | 223990_at                                       |
| <i>C4orf51</i>      | ENSG00000237136 | Hs.452865          | Not on array                                    |
| <i>C5orf47</i>      | ENSG00000185056 | Hs.131469          | 1557056_at, 1557057_a_at                        |
| <i>C5orf48</i>      | ENSG00000196900 | Hs.177983          | 237428_at                                       |
| <i>C5orf50</i>      | ENSG00000185662 | Hs.591740          | Not on array                                    |
| <i>C7orf72</i>      | ENSG00000164500 | Hs.99248           | Not on array                                    |
| <i>CATSPERI</i>     | ENSG00000175294 | Hs.189105          | 1552335_at                                      |
| <i>CCDC38</i>       | ENSG00000165972 | Hs.210377          | 1553893_at                                      |
| <i>CCDC79</i>       | ENSG00000177461 | Hs.376505          | 1557620_a_at                                    |
| <i>CCDC105</i>      | ENSG00000160994 | Hs.375985          | 1553451_at                                      |
| <i>CST8</i>         | ENSG00000125815 | Hs.121602          | 220627_at                                       |
| <i>CYL1C1</i>       | ENSG00000183035 | Hs.444230          | 216778_s_at, 216779_at, 216809_at               |
| <i>CYLC2</i>        | ENSG00000155833 | Hs.3232            | 207780_at                                       |
| <i>DDX4</i>         | ENSG00000152670 | Hs.223581          | 221630_s_at                                     |
| <i>EFCAB9</i>       | ENSG00000214360 | Hs.716824          | Not on array                                    |
| <i>GLT6D1</i>       | ENSG00000204007 | Hs.522491          | Not on array                                    |
| <i>IQCF3</i>        | ENSG00000229972 | Hs.729443          | 1555235_s_at, 236871_s_at                       |
| <i>KCNU1</i>        | ENSG00000215262 | Hs.13861           | 237273_at,                                      |
| <i>NT5C1B</i>       | ENSG00000185013 | Hs.120319          | 1554368_at, 222203_s_at, 243100_at              |
| <i>ODF3</i>         | ENSG00000177947 | Hs.350949          | 1553051_s_at, 233795_at                         |
| <i>SYCP3</i>        | ENSG00000139351 | Hs.506504          | 231618_s_at,                                    |
| <i>SUNCI (SUN3)</i> | ENSG00000164744 | Hs.406711          | 1553599_a_at, 241861_at                         |
| <i>TCTE3</i>        | ENSG00000184786 | Hs.733746          | 1554400_at, 1554401_a_at, 1557945_at, 232258_at |
| <i>TMEM202</i>      | ENSG00000187806 | Hs.446069          | Not on array                                    |
| <i>TMEM225</i>      | ENSG00000204300 | Hs.98377           | 244460_at                                       |
| <i>TRIML1</i>       | ENSG00000184108 | Hs.348618          | 1557677_a_at                                    |

**Table S3: List of the 80 data sets supported by the microarray meta-analysis including the corresponding cancer type, cancer sub-type and tissue type.**

| Data set name                  | Cancer type          | Cancer sub-type          | Tissue            |
|--------------------------------|----------------------|--------------------------|-------------------|
| E-GEOD-10927_ACA               | Adrenal cancer       | Adenoma                  | Adrenal gland     |
| E-GEOD-10927_ACC               | Adrenal cancer       | Carcinoma                | Adrenal gland     |
| GSE12368_ACA                   | Adrenal cancer       | Adenoma                  | Adrenal gland     |
| GSE12368_ACC                   | Adrenal cancer       | Carcinoma                | Adrenal gland     |
| GSE8514_Adrenal_Ad             | Adrenal cancer       | Adenoma                  | Adrenal gland     |
| E-GEOD-21354_Brain_AC          | Brain cancer         | Sarcoma                  | Brain             |
| E-GEOD-21354_Brain_EM          | Brain cancer         | Sarcoma                  | Brain             |
| E-GEOD-21354_Brain_OG          | Brain cancer         | Sarcoma                  | Brain             |
| E-MEXP-2351_Brain_AC           | Brain cancer         | Sarcoma                  | Brain             |
| GSE19728_Brain_C               | Brain cancer         | Sarcoma                  | Brain             |
| E-GEOD-20086_Breast_C          | Breast cancer        | Carcinoma                | Breast            |
| E-GEOD-21653_Breast_BLC        | Breast cancer        | Carcinoma                | Breast            |
| E-GEOD-21653_Breast_ERBB2      | Breast cancer        | Carcinoma                | Breast            |
| E-GEOD-21653_Breast_LuminalA   | Breast cancer        | Carcinoma                | Breast            |
| E-GEOD-21653_Breast_LuminalB   | Breast cancer        | Carcinoma                | Breast            |
| E-GEOD-22544_Breast_C          | Breast cancer        | Carcinoma                | Breast            |
| E-GEOD-5764_Breast_IDC         | Breast cancer        | Carcinoma                | Breast            |
| E-GEOD-5764_Breast_ILC         | Breast cancer        | Carcinoma                | Breast            |
| E-GEOD-7904_Breast_BLC         | Breast cancer        | Carcinoma                | Breast            |
| E-GEOD-7904_Breast_BRCA1       | Breast cancer        | Carcinoma                | Breast            |
| E-GEOD-7904_Breast_NonBLC      | Breast cancer        | Carcinoma                | Breast            |
| E-GEOD-18105_Colorectal_C      | Colorectal cancer    | Carcinoma                | Colon             |
| E-GEOD-18105_Colorectal_Met    | Colorectal cancer    | Metastasis               | Colon             |
| E-GEOD-18105_Colorectal_MRC    | Colorectal cancer    | Metastasis               | Colon             |
| E-GEOD-20916_Colorectal_Ad     | Colorectal cancer    | Adenoma                  | Colon             |
| E-GEOD-20916_Colorectal_ADC    | Colorectal cancer    | Carcinoma                | Colon             |
| E-GEOD-20916_Colorectal_C      | Colorectal cancer    | Carcinoma                | Colon             |
| E-GEOD-20916_Colorectal_Ep_Ad  | Colorectal cancer    | Adenoma                  | Colon             |
| E-GEOD-20916_Colorectal_Ep_C   | Colorectal cancer    | Carcinoma                | Colon             |
| E-GEOD-20916_Colorectal_Muc_Ad | Colorectal cancer    | Adenoma                  | Colon             |
| E-GEOD-20916_Colorectal_Muc_C  | Colorectal cancer    | Carcinoma                | Colon             |
| E-GEOD-23878_Colorectal_C      | Colorectal cancer    | Carcinoma                | Colon             |
| E-GEOD-4183_Colorectal_C       | Colorectal cancer    | Carcinoma                | Colon             |
| E-GEOD-4183_Colorectal_PreAd   | Colorectal cancer    | Adenoma                  | Colon             |
| E-GEOD-12452_NPC               | Head and neck cancer | Carcinoma                | Nasopharynx       |
| E-GEOD-17351_ESCC              | Head and neck cancer | Carcinoma                | Esophagus         |
| E-GEOD-30784_OSCC              | Head and neck cancer | Carcinoma                | Oral tissue       |
| E-GEOD-30784_OSCC_dysplasia    | Head and neck cancer | Carcinoma                | Oral tissue       |
| GSE6791_OSCC                   | Head and neck cancer | Carcinoma                | Oral tissue       |
| GSE26886_EAC.txt               | Head and neck cancer | Carcinoma                | Esophagus         |
| GSE26886_ESCC.txt              | Head and neck cancer | Carcinoma                | Esophagus         |
| E-GEOD-24739_CML               | Leukemia             | Hematological malignancy | Blood/bone marrow |
| E-GEOD-26713_TALL              | Leukemia             | Hematological malignancy | Blood/bone marrow |
| GSE14924_AML_CD4               | Leukemia             | Hematological malignancy | Blood/bone marrow |
| GSE14924_AML_CD8               | Leukemia             | Hematological malignancy | Blood/bone marrow |
| E-GEOD-19188_Lung_ADC          | Lung cancer          | Carcinoma                | Lung              |
| E-GEOD-19188_Lung_LCC          | Lung cancer          | Carcinoma                | Lung              |
| E-GEOD-19188_Lung_SCC          | Lung cancer          | Carcinoma                | Lung              |
| E-GEOD-19804_Lung_C            | Lung cancer          | Carcinoma                | Lung              |
| E-GEOD-31210_Lung_ADC          | Lung cancer          | Carcinoma                | Lung              |
| GSE18842_Lung_C                | Lung cancer          | Carcinoma                | Lung              |
| E-GEOD-35331_Flymph            | Lymphoma             | Hematological malignancy | Blood/bone marrow |
| E-GEOD-6338_Lymphoma           | Lymphoma             | Hematological malignancy | Lymph node        |
| E-MEXP-2957_CLL                | Lymphoma             | Hematological malignancy | Blood/bone marrow |
| GSE23293_CLL                   | Lymphoma             | Hematological malignancy | Blood/bone marrow |
| GSE23293_Flymph                | Lymphoma             | Hematological malignancy | Blood/bone marrow |
| GSE23293_MALTLymph             | Lymphoma             | Hematological malignancy | Blood/bone marrow |
| GSE25550_MALTLymph             | Lymphoma             | Hematological malignancy | Spleen            |
| GSE26725_CLL                   | Lymphoma             | Hematological malignancy | Blood/bone marrow |
| E-GEOD-14001_Ovarian_C_HG      | Ovarian cancer       | Carcinoma                | Ovary             |
| E-GEOD-14001_Ovarian_C_LG      | Ovarian cancer       | Carcinoma                | Ovary             |
| E-GEOD-18520_Ovarian_C         | Ovarian cancer       | Carcinoma                | Ovary             |
| E-GEOD-27651_Ovarian_C_HG      | Ovarian cancer       | Carcinoma                | Ovary             |
| E-GEOD-27651_Ovarian_C_LM      | Ovarian cancer       | Carcinoma                | Ovary             |
| E-GEOD-22780_Pancreatic_ADC    | Pancreatic cancer    | Carcinoma                | Pancreas          |

**Table S3. List of the 80 data sets supported by the microarray meta-analysis including the corresponding cancer type, cancer sub-type and tissue type. (Continued)**

| Data set name                  | Cancer type       | Cancer sub-type | Tissue        |
|--------------------------------|-------------------|-----------------|---------------|
| GSE15471_Pancreatic_C          | Pancreatic cancer | Carcinoma       | Pancreas      |
| E-GEOD-17906_Prostate_C        | Prostate cancer   | Carcinoma       | Prostate      |
| E-GEOD-30522_Prostate_C        | Prostate cancer   | Carcinoma       | Prostate      |
| E-GEOD-12606_Renal_C           | Renal cancer      | Carcinoma       | Kidney        |
| E-GEOD-12606_Renal_Met         | Renal cancer      | Metastasis      | Kidney        |
| E-TABM-282_Renal_C             | Renal cancer      | Carcinoma       | Kidney        |
| GSE11151_CRCC                  | Renal cancer      | Carcinoma       | Kidney        |
| GSE11151_PRCC                  | Renal cancer      | Carcinoma       | Kidney        |
| GSE11151_Renal_C               | Renal cancer      | Carcinoma       | Kidney        |
| GSE11151_Renal_Onc             | Renal cancer      | Carcinoma       | Kidney        |
| E-GEOD-6004_Thyroid_C_Center   | Thyroid cancer    | Carcinoma       | Thyroid gland |
| E-GEOD-6004_Thyroid_C_Invasive | Thyroid cancer    | Carcinoma       | Thyroid gland |
| E-MEXP-2442_Thyroid_ATC        | Thyroid cancer    | Carcinoma       | Thyroid gland |
| E-MEXP-2442_Thyroid_FAd        | Thyroid cancer    | Adenoma         | Thyroid gland |
| E-MEXP-2442_Thyroid_FCarc      | Thyroid cancer    | Carcinoma       | Thyroid gland |

  

| Abbreviation | Meaning                                |
|--------------|----------------------------------------|
| AC           | Astrocytoma                            |
| ACA          | Adrenocortical adenoma                 |
| ACC          | Adrenocortical carcinoma               |
| Ad           | Adenoma                                |
| ADC          | Adenocarcinoma                         |
| AdvHCC       | Advanced hepatocellular carcinoma      |
| ATC          | Thyroid anaplastic carcinoma           |
| BLC          | Basal-like cancer                      |
| BM           | Bone marrow                            |
| BRCA1        | BRCA1-associated                       |
| C            | Cancer                                 |
| Center       | Center area                            |
| CLL          | Chronic lymphocytic leukemia           |
| CML          | Chronic myelogenous leukemia           |
| CRCC         | Chromophobe renal cell cancer          |
| EAC          | Esophageal adenocarcinoma              |
| EarlyHCC     | Early hepatocellular carcinoma         |
| ED           | Ependymoma                             |
| Ep           | Epithelium                             |
| ESCC         | Esophageal squamous cell carcinoma     |
| FAd          | Follicular adenoma                     |
| FCarc        | Follicular carcinoma                   |
| Flymph       | Follicular lymphoma                    |
| HG           | High grade                             |
| IDC          | Invasive ductal carcinoma              |
| ILC          | Invasive lobular carcinoma             |
| Invasive     | Invasive area                          |
| LCC          | Large-cell carcinoma                   |
| LG           | Low grade                              |
| LM           | Low-malignant                          |
| Met          | Metastatic                             |
| MRC          | Metastatic recurrence                  |
| Muc          | Mucosa                                 |
| Neo          | Neoplasm                               |
| NPC          | Nasopharyngeal carcinoma               |
| OG           | Oligodendro-glioma                     |
| Onc          | Oncocytoma                             |
| OSCC         | Oral squamous cell carcinoma           |
| OTSCC        | Oral tongue squamous cell carcinoma    |
| PRCC         | Papillary renal cell cancer            |
| PreAd        | Precancerous adenoma                   |
| PTC          | Papillary thyroid cancer               |
| SCC          | Squamous cell carcinoma                |
| TALL         | T-cell acute lymphoblastic leukemia    |
| VAdvHCC      | Very advanced hepatocellular carcinoma |
| VEarlyHCC    | Very early hepatocellular carcinoma    |

**Table S4: List the 33 candidates and three control CTA genes (*MAGE-A1*, *GAGE*, *SSX2*) including their coverage on the arrays and their cancer-specific up regulation according to the microarray meta-analysis. For each candidate the meta-log 2-fold change (log2FC) and the confidence intervals (CI left, CI right) are stated.**

| Gene                          | Ensembl ID      | Array Coverage                                        | Cancer type                                                     | log2FC                       | CI left                       | CI right                     |
|-------------------------------|-----------------|-------------------------------------------------------|-----------------------------------------------------------------|------------------------------|-------------------------------|------------------------------|
| <i>ACTRT1</i>                 | ENSG00000123165 | Not on array                                          |                                                                 |                              |                               |                              |
| <i>BRDT</i>                   | ENSG00000137948 | 206787_at                                             | Lung cancer                                                     | 0.97                         | 0.22                          | 1.73                         |
| <i>C12orf12</i>               | ENSG00000197651 | 236968_at                                             |                                                                 |                              |                               |                              |
| <i>C15orf55</i>               | ENSG00000184507 | 1564603_at, 231338_at                                 | Ovarian cancer                                                  | 1.40                         | 0.33                          | 2.47                         |
| <i>C17orf98</i>               | ENSG00000214556 | 244316_at                                             | Ovarian cancer                                                  | 1.14                         | -0.17                         | 2.44                         |
| <i>C19orf67</i>               | ENSG00000188032 | Not on array                                          |                                                                 |                              |                               |                              |
| <i>C1orf65</i>                | ENSG00000178395 | 1552391_at                                            |                                                                 |                              |                               |                              |
| <i>C20orf201</i>              | ENSG00000171695 | 1554977_at                                            | Ovarian cancer                                                  | 1.05                         | 0.11                          | 1.99                         |
| <i>C20orf79</i>               | ENSG00000132631 | 231134_at                                             |                                                                 |                              |                               |                              |
| <i>C22orf33</i>               | ENSG00000185264 | 231617_at                                             |                                                                 |                              |                               |                              |
| <i>C9orf11</i>                | ENSG00000120160 | 1554981_at, 1554982_a_at,<br>232868_at                | Ovarian cancer<br>Brain cancer                                  | 1.80<br>1.83                 | 0.56<br>-0.30                 | 3.05<br>3.95                 |
| <i>CXorf27</i>                | ENSG00000187516 | 215142_at                                             |                                                                 |                              |                               |                              |
| <i>DUSP21</i>                 | ENSG00000189037 | 220515_at                                             |                                                                 |                              |                               |                              |
| <i>FABP9</i>                  | ENSG00000205186 | Not on array                                          |                                                                 |                              |                               |                              |
| <i>FTMT</i>                   | ENSG00000181867 | Not on array                                          |                                                                 |                              |                               |                              |
| <i>GAGE1</i>                  | ENSG00000205777 | 207086_x_at, 207739_s_at,<br>208155_x_at, 208283_at   | Ovarian cancer<br>Lung cancer<br>Brain cancer                   | 1.23<br>1.13<br>2.38         | -0.30<br>0.30<br>0.30         | 2.76<br>1.95<br>4.47         |
| <i>IL31</i>                   | ENSG00000204671 | Not on array                                          |                                                                 |                              |                               |                              |
| <i>LUZP4</i>                  | ENSG00000102021 | 220665_at                                             | Ovarian cancer                                                  | 2.73                         | 1.38                          | 4.08                         |
| <i>MAGEA1</i>                 | ENSG00000198681 | 207325_x_at                                           | Head and neck cancer<br>Lung cancer                             | 1.21<br>1.48                 | 0.15<br>0.67                  | 2.28<br>2.30                 |
| <i>MAGEB5</i>                 | ENSG00000188408 | Not on array                                          |                                                                 |                              |                               |                              |
| <i>MBD3L1</i>                 | ENSG00000170948 | 1552458_at, 1552459_a_at                              | Ovarian cancer                                                  | 2.56                         | 1.45                          | 3.66                         |
| <i>ODF4</i>                   | ENSG00000184650 | 1552408_at, 1552409_a_at                              | Ovarian cancer                                                  | 1.09                         | -0.06                         | 2.23                         |
| <i>PAPOLB</i>                 | ENSG00000218823 | 208271_at, 242158_at                                  | Ovarian cancer<br>Brain cancer                                  | 1.70<br>1.36                 | 0.64<br>0.32                  | 2.76<br>2.40                 |
| <i>PFN3</i>                   | ENSG00000196570 | Not on array                                          |                                                                 |                              |                               |                              |
| <i>PRDM9</i>                  | ENSG00000164256 | 221151_at                                             | Ovarian cancer                                                  | 1.06                         | 0.01                          | 2.12                         |
| <i>RAD21L1</i>                | ENSG00000244588 | 215917_at, 234662_at                                  |                                                                 |                              |                               |                              |
| <i>SEPT12</i>                 | ENSG00000140623 | 230947_at                                             | Ovarian cancer                                                  | 0.75                         | 0.04                          | 1.45                         |
| <i>SMC1<math>\beta</math></i> | ENSG00000077935 | 1553249_at                                            | Brain cancer                                                    | 1.39                         | -0.46                         | 3.24                         |
| <i>SSX2</i>                   | ENSG00000241476 | 207493_x_at, 210497_x_at,<br>215881_x_at, 216471_x_at | Adrenal cancer<br>Ovarian cancer<br>Lung cancer<br>Brain cancer | 1.09<br>1.07<br>0.89<br>1.50 | 0.08<br>-0.19<br>0.28<br>0.33 | 2.10<br>2.34<br>1.51<br>2.67 |
| <i>STRA8</i>                  | ENSG00000146857 | Not on array                                          |                                                                 |                              |                               |                              |
| <i>SYCP1</i>                  | ENSG00000198765 | 206740_x_at, 216917_s_at                              | Ovarian cancer<br>Brain cancer                                  | 1.64<br>1.78                 | 0.51<br>0.12                  | 2.77<br>3.45                 |
| <i>TDRD12</i>                 | ENSG00000173809 | 215356_at                                             |                                                                 |                              |                               |                              |
| <i>TEPP</i>                   | ENSG00000159648 | 240119_at                                             |                                                                 |                              |                               |                              |
| <i>TEX19</i>                  | ENSG00000182459 | 241367_at                                             | Ovarian cancer<br>Lung cancer<br>Leukemia                       | 0.96<br>0.47<br>0.47         | 0.14<br>0.01<br>0.01          | 1.78<br>0.93<br>0.93         |
| <i>TSSK1B</i>                 | ENSG00000212122 | 211694_at                                             |                                                                 |                              |                               |                              |
| <i>ZCCHC13</i>                | ENSG00000187969 | 1554210_at                                            | Ovarian cancer                                                  | 1.41                         | 0.40                          | 2.42                         |

**Table S5: Full list of all 52 meiCT genes indicating the method used to designate them and their classification from the EST screening of the original 375 human orthologues of the mouse meiosis-specific genes.**

| Gene name        | Chromosome | Original EST class | Method of meiCT designation | CT class          |
|------------------|------------|--------------------|-----------------------------|-------------------|
| <i>ACTRT1</i>    | X          | 1                  | R, M                        | CT restricted     |
| <i>ADAD1</i>     | 4          | 3                  | M                           | CT restricted*    |
| <i>BRDT</i>      | 1          | 3                  | R, M                        | CT restricted     |
| <i>C1orf65</i>   | 1          | 3                  | R                           | CT restricted     |
| <i>C4orf17</i>   | 4          | 2                  | S                           | CT restricted*    |
| <i>C5orf47</i>   | 5          | 2                  | M                           | CT restricted*    |
| <i>C5orf48</i>   | 5          | 2                  | S                           | CT restricted*    |
| <i>C9orf11</i>   | 9          | 2                  | R, M                        | CT/CNS selective  |
| <i>C12orf12</i>  | 12         | 2                  | R, S                        | CT restricted     |
| <i>C17orf98</i>  | 17         | 1                  | R, M                        | CT restricted     |
| <i>C19orf67</i>  | 19         | 2                  | R                           | CT restricted     |
| <i>C20orf79</i>  | 20         | 2                  | R, S                        | CT restricted     |
| <i>C20orf201</i> | 20         | 2                  | R, M                        | CT/CNS restricted |
| <i>C22orf33</i>  | 22         | 2                  | R, S                        | CT restricted     |
| <i>CXorf27</i>   | X          | 2                  | R, S                        | CT/CNS selective  |
| <i>CATSPER1</i>  | 11         | 3                  | S                           | CT restricted*    |
| <i>CCDC38</i>    | 12         | 2                  | S                           | CT restricted*    |
| <i>CCDC79</i>    | 16         | 2                  | M                           | CT restricted*    |
| <i>CCDC105</i>   | 19         | 2                  | S                           | CT restricted*    |
| <i>CST8</i>      | 20         | 2                  | S                           | CT restricted*    |
| <i>CYCL1</i>     | X          | 2                  | M                           | CT restricted*    |
| <i>CYCL2</i>     | 9          | 2                  | M                           | CT restricted*    |
| <i>DDX4</i>      | 5          | 2                  | S                           | CT restricted*    |
| <i>DUSP21</i>    | X          | 2                  | R, S                        | CT selective      |
| <i>FABP9</i>     | 4          | 2                  | R                           | CT selective      |
| <i>FTMT</i>      | 5          | 2                  | R                           | CT selective      |
| <i>IL31</i>      | 12         | 2                  | R                           | CT selective      |
| <i>IQCF3</i>     | 3          | 2                  | M                           | CT restricted*    |
| <i>LUZP4</i>     | X          | 2                  | R, M                        | CT restricted     |
| <i>MAGE-B5</i>   | X          | 2                  | R                           | CT restricted     |
| <i>MBD3L1</i>    | 19         | 2                  | R, M                        | CT selective      |
| <i>NT5C1B</i>    | 2          | 2                  | M                           | CT restricted*    |
| <i>NUT</i>       | 15         | Manual selection   | R, M                        | CT restricted     |
| <i>ODF3</i>      | 11         | 2                  | S                           | CT restricted*    |
| <i>ODF4</i>      | 17         | 1                  | R, M                        | CT restricted     |
| <i>PAPOLB</i>    | 7          | 2                  | R, M                        | CT/CNS restricted |
| <i>PFN3</i>      | 5          | 2                  | R                           | CT/CNS selective  |
| <i>PRDM9</i>     | 5          | Manual selection   | R, M                        | CT restricted     |
| <i>RAD21L</i>    | 20         | Manual selection   | R, S                        | CT restricted     |
| <i>SEPT12</i>    | 16         | 3                  | R, M                        | CT/CNS restricted |
| <i>SMC1β</i>     | 22         | Manual selection   | R, M                        | CT restricted     |
| <i>STRA8</i>     | 7          | Manual selection   | R                           | CT restricted     |
| <i>SYCP1</i>     | 1          | Manual selection   | R, M                        | CT/CNS restricted |
| <i>SYCP3</i>     | 12         | 2                  | M                           | CT restricted*    |
| <i>TCTE3</i>     | 6          | 2                  | M                           | CT restricted*    |
| <i>TDRD12</i>    | 19         | 2                  | R, S                        | CT restricted     |
| <i>TEPP</i>      | 16         | 2                  | R, S                        | CT selective      |
| <i>TEX19</i>     | 17         | 3                  | R, M                        | CT selective      |
| <i>TMEM225</i>   | 11         | 2                  | S                           | CT restricted*    |
| <i>TRIML1</i>    | 4          | 3                  | S                           | CT restricted*    |
| <i>TSSK1B</i>    | 5          | Manual selection   | R, S                        | CT/CNS restricted |
| <i>ZCCHC13</i>   | X          | 2                  | R, M                        | CT/CNS selective  |

\* Those genes predicted to be meiCT genes based on microarray analyses (meta or individual) have been validated for tight testis specificity by RT-PCR (see Supplementary Information Table S2).

R – Determined to be expressed in cancer samples by RT-PCR.

M – Determined to be expressed in cancer samples by microarray meta-analyses of combined microarray data sets.

S – Determined to be expressed in cancer samples by analysis of at least one individual microarray data set; these designations have the limitations imposed by statistical rigour being derived from a single microarray data set.

## SUPPLEMENTARY INFORMATION: COMPUTATIONAL ANALYSES

### Generation of a meiosis-specific data set

The meiosis-specific gene set was generated using: Perl 5.8.8 (available from: <http://www.perl.org>); and the Biomart portals (1) for GermOnline (2), MGI (3), and Ensembl (4). The initial meiosis gene set was derived from a microarray study by Chalmel *et al.* (5,6) whereby the meiotic transcriptome of mice was studied by analysing 17 somatic non-testicular control tissues, total testis, isolated seminiferous tubules as well as enriched populations of Sertoli cells, spermatogonia, pachytene spermatocytes, and round spermatids. 744 mouse genes were selected, which were found to be differentially expressed in testis, assigned to the meiotic or post-meiotic cluster as defined by Chalmel *et al.* (5,6), and not expressed in any other tissue tested. 408 human orthologues of the 744 meiosis-specific mouse genes were identified. To improve the data quality, the gene set was cross-validated with a set of human genes known to be involved in mitosis (Mitocheck) (7). The resulting 375 genes were assigned to Unigene cluster IDs.

### EST analysis pipeline

The pipeline was implemented using: MySQL 5.0.77 (available from: <http://www.mysql.com>); and Perl 5.8.8 (available from: <http://www.perl.org>). The EST data derived from the Unigene database (8). For each of the 375 genes the Unigene EST profile was evaluated to determine the expression in normal and cancerous tissues. ESTs originating from cell line or uncharacterized/mixed tissue libraries were excluded as well as ESTs showing less than 90% similarity to the corresponding human protein. Genes were sorted into 5 classes according to their expression profile: (i) testis-restricted expression in normal individuals as well as cancer expression (class 1); (ii) testis-restricted expression in normal individuals (class 2); (iii) testis and brain-restricted expression in normal individuals as well as cancer expression (class 3); (iv) testis and brain-restricted expression in normal individuals (class 4); and (v) somatic expression in normal individuals (class 5). Class 5 genes were discarded.

### Microarray meta-analysis pipeline

The pipeline was implemented using: R 2.12.1 (available from: <http://www.cran.r-project.org>) (9); the Bioconductor package (10); MySQL 5.0.77 (available from: <http://www.mysql.com>); and Perl 5.8.8 (available from: <http://www.perl.org>).

Raw data was obtained from microarray experiments using patient-derived, untreated cancer samples

with corresponding normal samples deposited in the ArrayExpress (11) or the GEO (12) repository. Data sets produced from the HG-U133 Plus 2 array from Affymetrix were selected, as this type is widely used and covers a large proportion of the human genome. Obtained data sets were sub-divided into cancer subtypes/stages as appropriate. Data sets with less than three control or cancer samples or data sets analysing tissues influenced by other diseases, fetal tissues or cancer-associated cells such as the cancer microenvironment were excluded. Only cancer types with at least two data sets could be included. This resulted in 92 data sets originating from 50 experiments and covering 13 different cancer types. The quality of the arrays was further assessed using the 'simpleaffy' package (13) and data sets with a scale factor of 3, an ActB 3':mid ratio of 3 and a GAPDH 3':mid ratio of 1.25 were selected. Based on this, 12 data sets had to be excluded completely. Individual CEL files from of 37 data sets were excluded, as they did not fulfill the quality requirements. This resulted in 80 individual cancer data sets originating from 45 experiments and covering 13 different cancer types (Supporting Information Table 3).

The raw data of all 80 data sets were re-analysed individually to assure uniformity of the analysis process. Data were pre-processed according to methods described by Hubbell *et al.* (14) using the 'affy' package (15). The data sets were filtered with the 33 candidates, the 3 control CTA genes and the 29 meiosis-specific genes respectively, in order to reduce the number of features and to enhance the statistical power. 25 of the candidates and all 3 control CTA genes were covered by the array sets (Supporting Information Table 4), and 21 of the meiosis-specific genes were covered by the array sets (Supporting Information Table 2). For computation of differentially expressed genes, the 'Limma' package (16) from Bioconductor was used, with p values adjusted for multiple testing with Benjamini and Hochberg's method to control the false discovery rate (17).

Subsequently, a meta-p value and a meta-log<sub>2</sub>-fold change value were computed for each cancer type as listed in Supplementary Table S3 using Stouffer's method (18) and weighted linear combination (19), respectively. In order to calculate a meta-p value, the individual two-sided p values were converted to one-sided p values for up and down regulation separately, as two-sided p values are oblivious to the effect direction (20). If multiple probes mapped to the same gene identifier the most extreme log<sub>2</sub>-fold change value with its corresponding p value was selected, as it is least likely to occur by chance. We selected genes with a meta-log<sub>2</sub>-fold change > 1 or a confidence interval that does not span 0, and a meta-p value < 0.05 as potentially significant. To visualize the data of the meta-analysis, Circos plots (21) and Forest plots (22) were created.
